# Supplementary material
Source: PubMed Central journal article supplement (PMC5820950)
Supplement: IAI.00458-17_zii999092298s1.pdf [file IAI.00458-17_zii999092298s1.pdf]

Supplementary information for Kerrinnes et al., **Utilization of host polyamines in alternatively activated macrophages promotes chronic infection by *Brucella abortus***

Fig. S1

Table S1. Composition of modified F12/K media

Table S2. Real-time PCR oligonucleotides

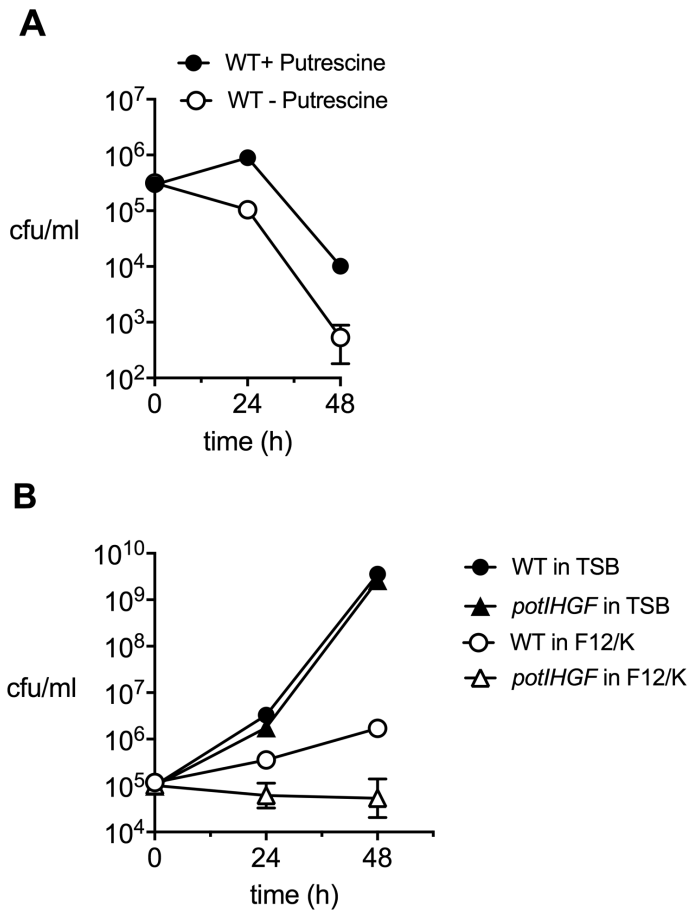

**Fig. S1: (A)** Growth of *B. abortus* in F12/K medium formulated with or without putrescine. **(B)** Growth of *B. abortus* 2308 or *potIHGF* mutant in TSB or in F12/K medium containing putrescine as sole carbon source.

**Table S1. Composition of modified F12/K media**

|                                                                         | concentration [mg/L] | source                        |
|-------------------------------------------------------------------------|----------------------|-------------------------------|
| <b>amino acids</b>                                                      |                      |                               |
| MEM Amino Acids Solution                                                | 1X                   | Life Technologies             |
| MEM Non-Essential Amino Acids Solution                                  | 1X                   | Life Technologies             |
| L-Glutamine                                                             | 292                  | Life Technologies             |
| <b>Vitamins</b>                                                         |                      |                               |
| 1X MEM Vitamin Solution                                                 |                      | Life Technologies             |
| Biotin                                                                  | 0.07                 | Sigma-Aldrich                 |
| Vitamin B <sub>12</sub>                                                 | 1.4                  | Sigma-Aldrich                 |
| <b>Inorganic Salts and additional substances</b>                        |                      |                               |
| Calcium Chloride (CaCl <sub>2</sub> ) (anhyd.)                          | 102                  | Sigma-Aldrich                 |
| Cupric sulfate (CuSO <sub>4</sub> ·5H <sub>2</sub> O)                   | 0.002                | Sigma-Aldrich                 |
| Ferric sulfate (FeSO <sub>4</sub> ·7H <sub>2</sub> O)                   | 0.8                  | Sigma-Aldrich                 |
| Magnesium Chloride (anhyd.)                                             | 49.7                 | Sigma-Aldrich                 |
| Magnesium Sulfate (MgSO <sub>4</sub> ) (anhyd.)                         | 192                  | Sigma-Aldrich                 |
| Sodium Chloride (NaCl)                                                  | 8500                 | Sigma-Aldrich                 |
| Sodium Bicarbonate (NaHCO <sub>3</sub> )                                | 2500                 | Sigma-Aldrich                 |
| Sodium Chloride (NaCl)                                                  | 7530                 | Sigma-Aldrich                 |
| Sodium Phosphate dibasic (Na <sub>2</sub> HPO <sub>4</sub> ) (anhyd.)   | 115.5                | Sigma-Aldrich                 |
| Sodium Phosphate monobasic (NaH <sub>2</sub> PO <sub>4</sub> ) (anhyd.) | 59                   | Sigma-Aldrich                 |
| Zinc sulfate (ZnSO <sub>4</sub> ·7H <sub>2</sub> O)                     | 0.144                | Sigma-Aldrich                 |
| D-Glucose (Dextrose)                                                    | 1260                 | Sigma-Aldrich                 |
| Hypoxanthine Na                                                         | 4                    | Sigma-Aldrich                 |
| Lipoic Acid                                                             | 0.21                 | Sigma-Aldrich                 |
| Phenol Red                                                              | 3                    | Sigma-Aldrich                 |
| Sodium Pyruvate                                                         | 220                  | Sigma-Aldrich                 |
| Thymidine                                                               | 0.7                  | Sigma-Aldrich                 |
| Putrescine 2HCl, when needed                                            | 0.32                 | Santa Cruz -<br>Biotechnology |

**Table S2. Real-time PCR oligonucleotides used in the study:**

|              | <b>primer sequence (5' to 3')</b> |
|--------------|-----------------------------------|
| mArg1-Fwd    | GCTGTCTTCCCAAGAGTTGGG             |
| mArg1-Rev    | ATGGAAGAGACCTTCAGCTAC             |
| mRplp0-2-Fwd | GATGGGCAACTGTACCTGACTG            |
| mRplp0-2-Rev | CTGGGCTCCTCTTGGAATG               |
| mSlc7a2-Fwd  | GCCTTTGTGGGCTTTGACTG              |
| mSlc7a2-Rev  | CCATCCTCCGCCATAGCATA              |
| mYm1-Fwd     | GGGCATACCTTTATCCTGAG              |
| mYm1-Rev     | CCACTGAAGTCATCCATGTC              |
